# Supplementary material for: Thermally populated “bright” states for wide-range and high temperature sensing in air
Source: Royal Society of Chemistry journal article supplement (doi:10.1039/c7cc00551b), 2017-01-01
Supplement: c7cc00551b1.pdf [file c7cc00551b1.pdf]

## ***Supporting Information***

### **Thermally populated “bright” states for wide-range and high temperature sensing in air**

Qiyun Fang,<sup>a</sup> Jiewei Li,<sup>c</sup> Shayu Li,<sup>b</sup> Ruihong Duan,<sup>b</sup> Shuangqing Wang,<sup>b</sup> Yuanping Yi,<sup>b</sup> Xudong Guo,<sup>b</sup> Yan Qian,<sup>\*a</sup> Wei Huang<sup>\*a, c</sup> and Guoqiang Yang<sup>\*b</sup>

*<sup>a</sup>Key Laboratory for Organic Electronics and Information Displays & Institute of Advanced Materials (IAM), Jiangsu National Synergetic Innovation Center for Advanced Materials (SICAM), Nanjing University of Posts & Telecommunications (NUPT), 9 Wenyuan Road, Nanjing 210023, China E-mail: iamyqian@njupt.edu.cn*

*<sup>b</sup>Key laboratory of Photochemistry and Key Laboratory of Organic Solids, Institute of Chemistry, University of Chinese Academy of Sciences, Chinese Academy of Sciences, Beijing 100190 China. E-mail: gqyang@iccas.ac.cn*

*<sup>c</sup>Key Laboratory of Flexible Electronics (KLOFE) & Institute of Advanced Materials (IAM), Jiangsu National Synergetic Innovation Center for Advanced Materials (SICAM), Nanjing Tech University (Nanjing Tech), Nanjing 211816, China. E-mail: iamwhuang@njtech.edu.cn*

**Materials and Instruments:** Chlorodiphenylphosphine, dichlorophenylphosphine and triethylphosphate were obtained from Alfa Aesar. Solvents in the experiment were distilled according to standard procedures before using. All chemical reactions were proceeded under the protection of the inert gases.  $^1\text{H}$  NMR and  $^{13}\text{C}$  NMR spectra were recorded on a Bruker Avance 400 spectrometer. MALDI-TOF-MS spectra were measured by a Bruker BIFLEX III spectrometer. Elemental analysis was performed by a Carlo Erba 1106. The absorption spectra were recorded on Hitachi UV-3010. The fluorescence spectra were collected on Hitachi F-4500. The concentrations of solution were  $1.0 \times 10^{-5}$  mol/L. The temperature of the sample was controlled with the help of a heating and cooling stage (HCS) from INSTEC. The fluorescence decay curves were performed on an Edinburgh FLS-920 instrument using single photon counting measurement (Samples were irradiated by Picoquant LDH-D-C-375 pulsed diode laser).

**Computational methods:** Geometry optimizations for the ground state and excited state of triaryphosphine oxide compounds molecule were carried using the ORCA software package with the DFT and TDDFT methods. B3LYP with the RIJCOSX approximation was employed here. All calculations above were employing basis set def2-svp and auxiliary basis set def2-svp/j.

### *Synthesis of diphenyl(pyren-1-yl)phosphine oxide (C1)*

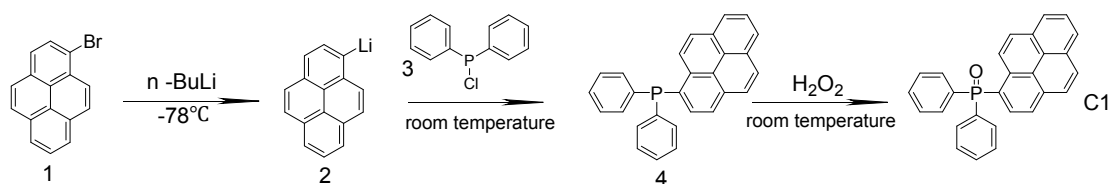

To a THF solution (80 ml) of 1-bromopyrene (2000 mg, 7.06 mmol) was added n-BuLi (5 ml, 7.76 mmol, 2.0 M in cyclohexane) at  $-78\text{ }^\circ\text{C}$ , which turned to a greenish suspension. After one hour, the temperature was allowed to naturally rise to room temperature. Stirring was then continued for a further hour. The mixture was then cooled again to  $-78\text{ }^\circ\text{C}$  and chlorodiphenylphosphine (1710 mg, 7.76 mmol) was added by injection. The suspension was gradually warmed to ambient temperature and stirred for 2 h. After reaction finished, dry methanol (10 ml) was added. The organic compound was extracted with dichloromethane and the combined organic layer was dried over sodium sulfate, filtered and evaporated under reduced pressure to get a white solid. The residue obtained was dissolved in dichloromethane and  $\text{H}_2\text{O}_2$  (10 ml, 30%) was added dropwise. After stirring for 4 h at room temperature, water (60 ml)

was added and the organic phase was extracted with dichloromethane (2× 40 ml), dried over anhydrous Na<sub>2</sub>SO<sub>4</sub>, filtered and the solvent was removed in vacuo. The crude reaction mixture was purified by column chromatography using hexane–ethyl acetate (1:3) as the eluent to afford C1, which was further purified by precipitating in chloroform and diethyl ether (1:2) mixture. Yield 60% (1.8 g); <sup>1</sup>H NMR (400 MHz, CDCl<sub>3</sub>, ppm): δ 8.85 (d, J = 9.3 Hz, 1H), 8.21–8.07 (m, 3H), 8.07–7.92 (m, 4H), 7.74–7.61 (m, 5H), 7.61–7.28 (m, 6H). <sup>13</sup>C NMR (400 MHz, CDCl<sub>3</sub>, ppm): δ 133.21, 133.17, 133.09, 132.85, 131.81, 131.21, 131.14, 130.85, 130.20, 130.18, 129.98, 129.40, 127.87, 127.64, 127.52, 126.07, 125.39, 125.29, 125.21, 125.14, 124.64, 124.13, 124.03, 123.58, 123.15, 122.58, 122.36. MALDI-TOF m/z: 403.00 [M]<sup>+</sup>. Anal. calcd for C<sub>28</sub>H<sub>19</sub>PO (402.42): C, 83.57%; H, 4.76%; found: C, 83.31%; H, 4.53%.

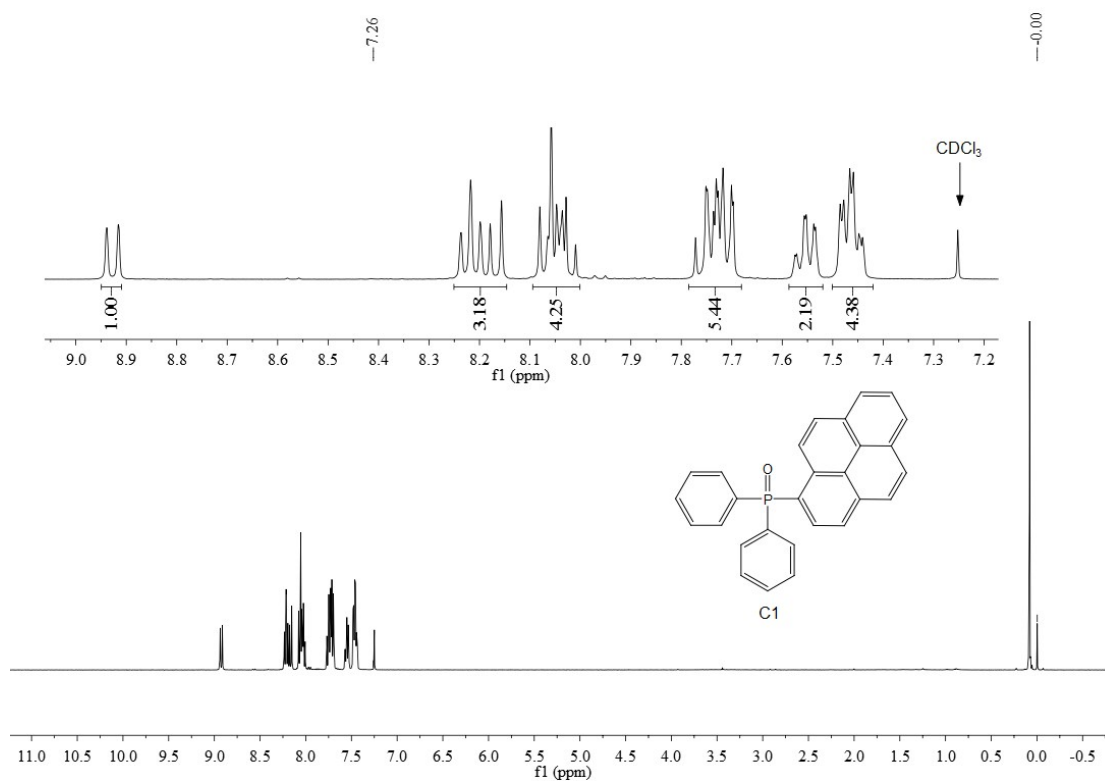

<sup>1</sup>H-NMR spectrum of C1 in CDCl<sub>3</sub>

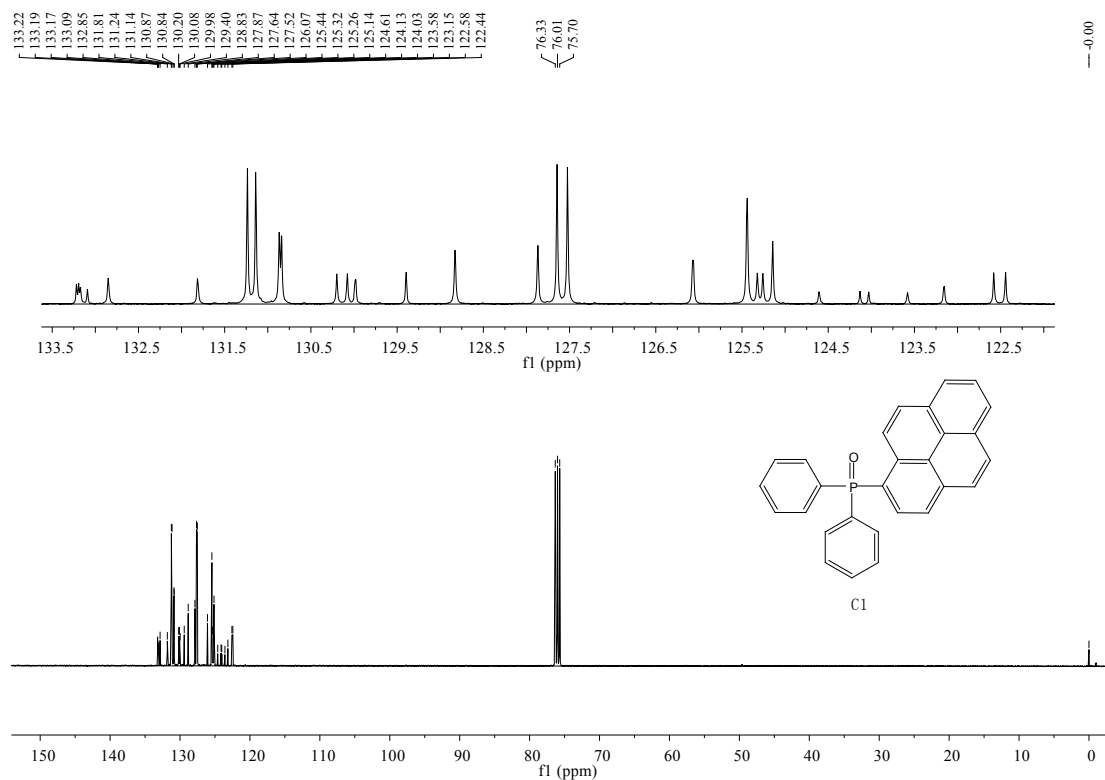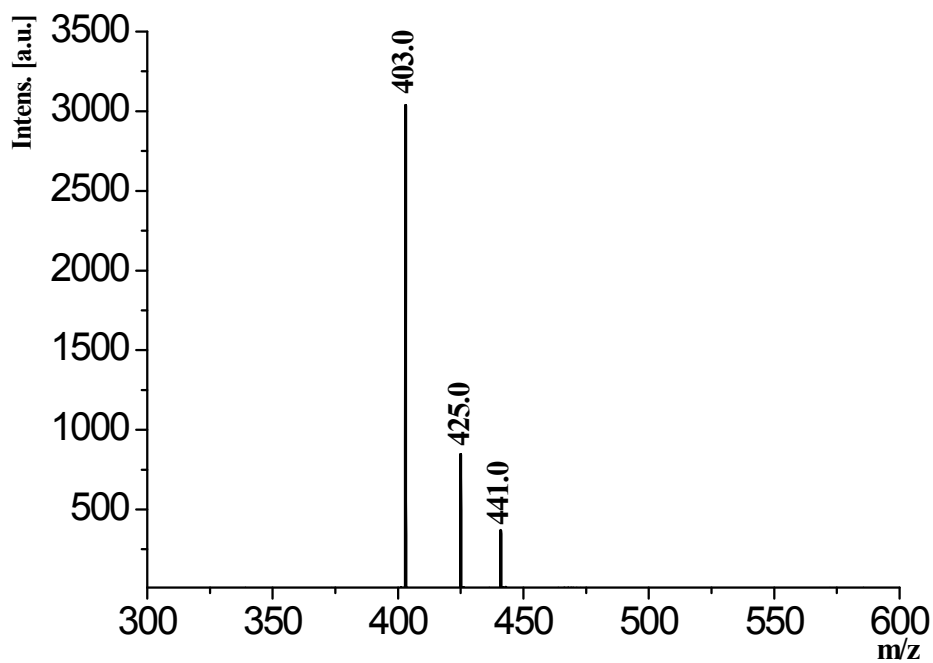

MALDI-TOF spectrum of C1

## Synthesis of phenyldi(pyren-1-yl)phosphine oxide (C2)

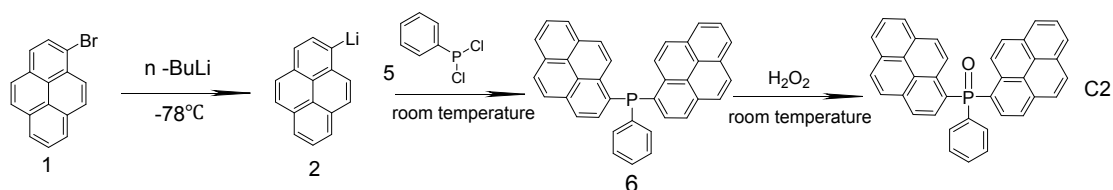

C2 was prepared according to a procedure similar to that of C1, using 1-bromopyrene (4000 mg, 14.12 mmol), n-BuLi (10 ml, 15.52 mmol, 2.0 M in cyclohexane) and dichlorophenylphosphine (1260 mg, 7.06 mmol) as the synthetic precursors. The obtained residue was purified by column chromatography (hexane–ethyl acetate 1:2) followed by precipitation in chloroform–diethyl ether (1:3). Yield 63% (2.3 g);  $^1\text{H}$  NMR (400 MHz,  $\text{CDCl}_3$ , ppm):  $\delta$  9.10 (d,  $J = 9.3\text{Hz}$ , 2H), 8.24–8.09 (m, 6H), 8.07–7.96 (m, 6H), 7.92 (d,  $J = 10.1\text{Hz}$ , 2H), 7.78–7.67 (m, 1H), 7.63 (d,  $J = 7.9\text{Hz}$ , 2H), 7.51 (t,  $J = 6.8\text{Hz}$ , 2H) 7.41 (t,  $J = 7.6\text{Hz}$ , 2H).  $^{13}\text{C}$  NMR (400 MHz,  $\text{CDCl}_3$ , ppm):  $\delta$  133.45, 133.37, 133.23, 133.20, 133.28, 132.26, 131.65, 131.55, 131.44, 131.34, 130.90, 130.80, 130.14, 130.04, 129.50, 128.80, 127.94, 127.71, 127.59, 126.93, 126.54, 126.08, 125.68, 125.62, 125.45, 125.35, 125.13, 124.31, 124.28, 124.18, 123.26, 122.76, 122.62, 120.69, 118.82, 117.27, 117.14. MALDI-TOF  $m/z$ : 527.10  $[\text{M}+\text{H}]^+$ . Anal. calcd for  $\text{C}_{38}\text{H}_{23}\text{PO}$  (526.15): C, 86.68; H, 4.40%; found: C, 88.51; H, 4.23%.

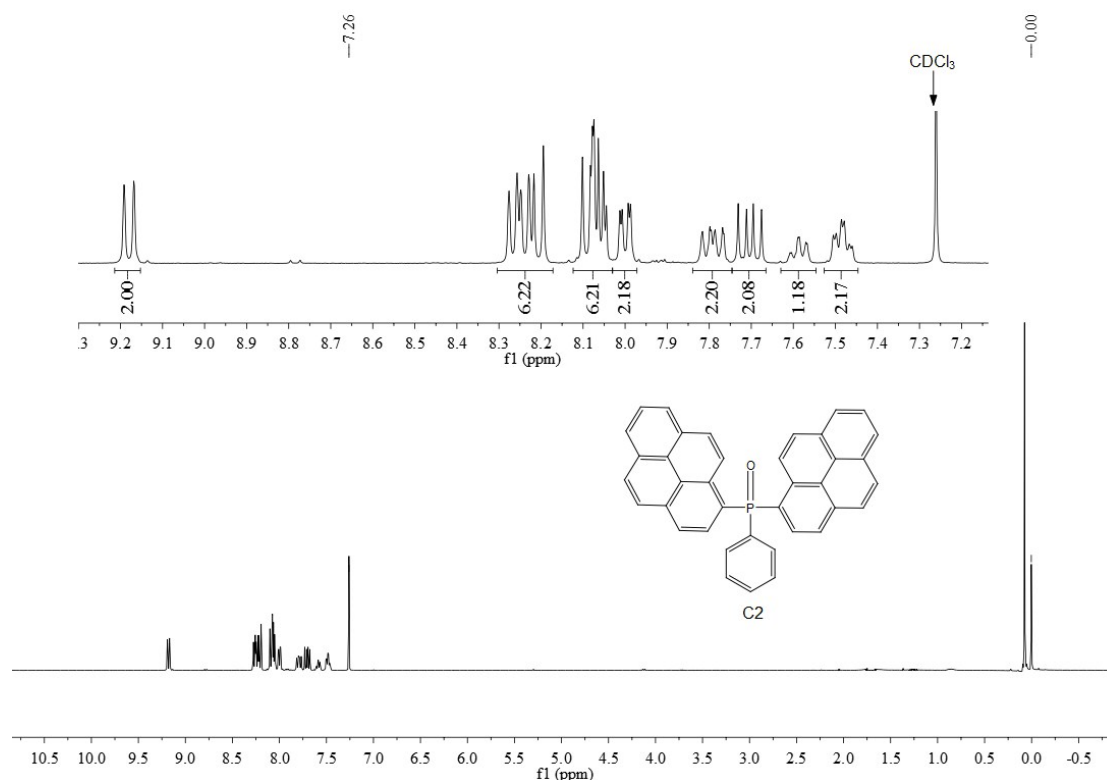

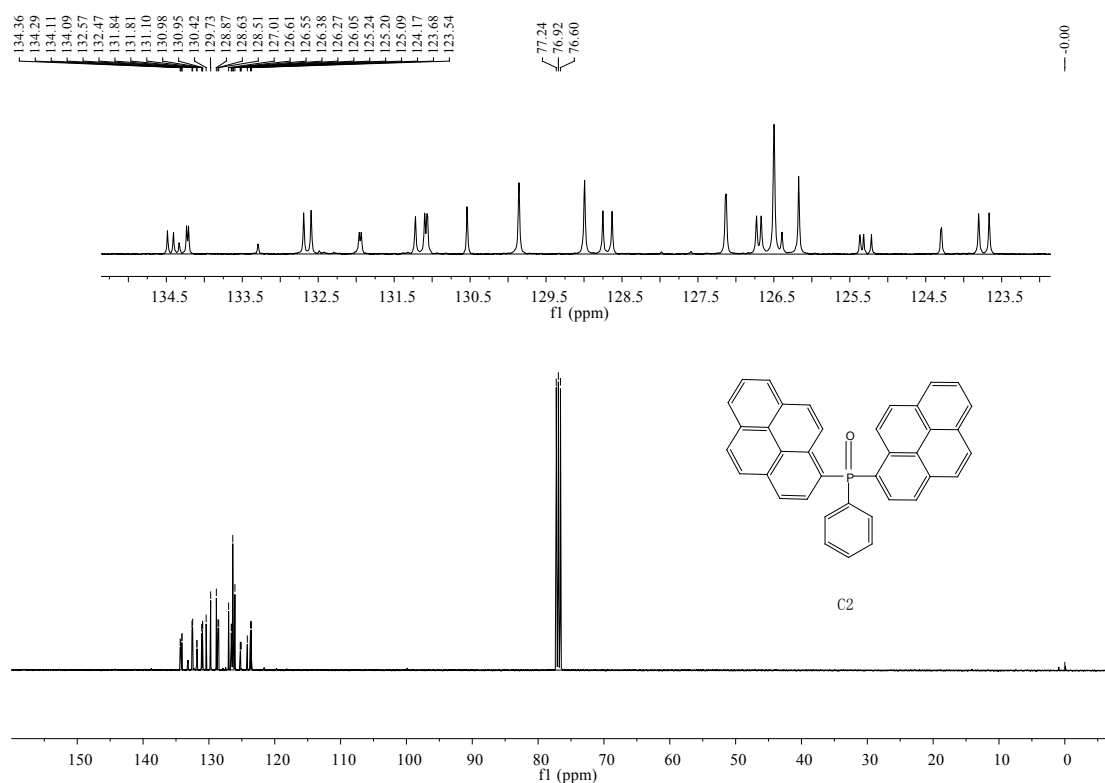

<sup>13</sup>C-NMR spectrum of C2 in CDCl<sub>3</sub>.

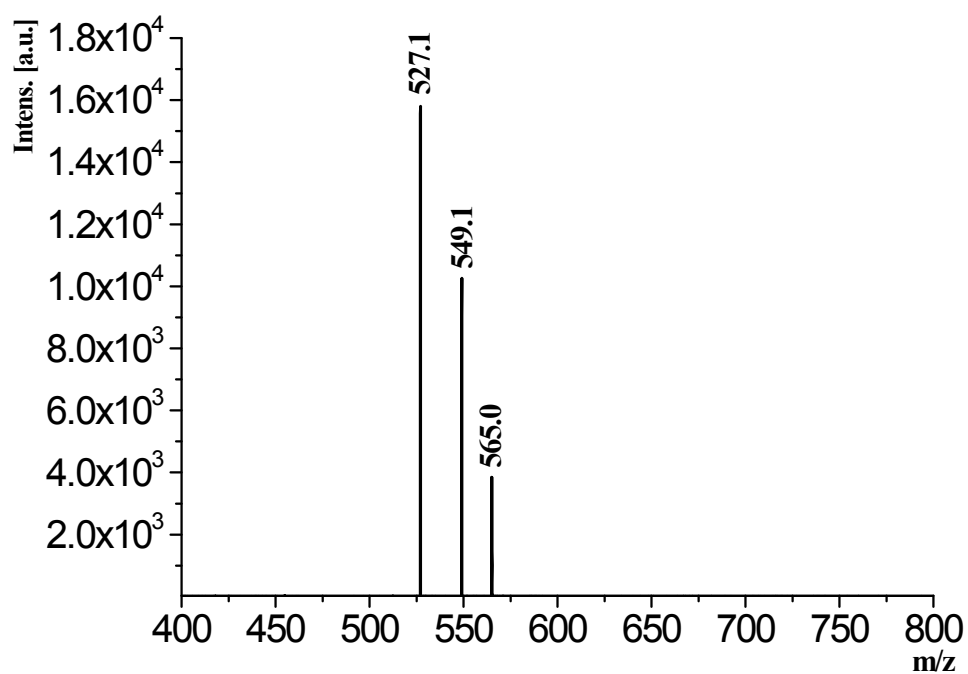

MALDI-TOF spectrum of C2

### Synthesis of tri(pyren-1-yl)phosphine oxide (C3)

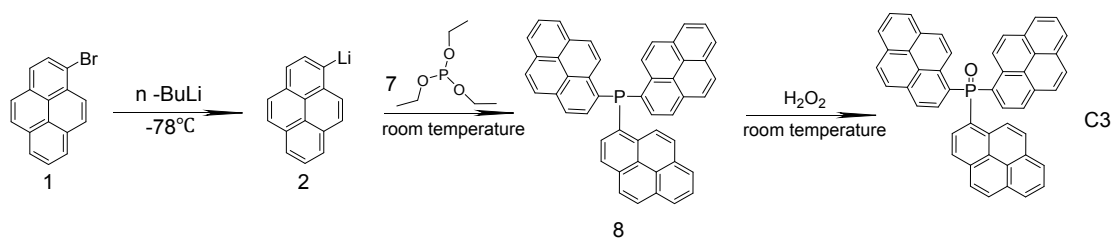

C3 was prepared according to a procedure similar to that of C1, using 1-bromopyrene (6000 mg, 21.18 mmol), n-BuLi (15 ml, 3.28 mmol, 2.0 M in cyclohexane) and triethylphosphate (1260 mg, 7.06 mmol) as the synthetic precursors. The obtained residue was purified by column chromatography (hexane–ethyl acetate 1:2) followed by precipitation in chloroform–diethyl ether (1:3). Yield 58% (2.7 g);  $^1\text{H}$  NMR (400 MHz,  $\text{CDCl}_3$ , ppm):  $\delta$ 8.74–8.63 (t,  $J = 8.6\text{Hz}$ , 3H), 8.32 (dd,  $J = 15.7$ , 7.8Hz, 2H), 8.23–8.10 (m, 10H), 8.10–7.93 (m, 8H), 7.68–7.57 (t,  $J = 7.8\text{Hz}$ , 2H), 7.54–7.44 (t,  $J = 7.8\text{Hz}$ , 2H).  $^{13}\text{C}$  NMR (400 MHz,  $\text{CDCl}_3$ , ppm):  $\delta$ 151.95, 139.64, 134.33, 134.23, 133.67, 133.53, 132.62, 132.53, 131.00, 130.30, 130.25, 130.20, 130.15, 130.08, 139.91, 129.80, 129.55, 128.49, 127.62, 127.37, 127.15, 127.10, 126.93, 126.48, 126.38, 126.22, 126.11, 125.64, 125.37, 125.23, 125.09, 124.71, 124.66, 124.36, 124.25, 124.16, 123.90, 123.77. MALDI-TOF  $m/z$ : 650.10  $[\text{M}]^+$ . Anal. calcd for  $\text{C}_{48}\text{H}_{27}\text{PO}$  (650.18): C, 88.60; H, 4.18%; found: C, 88.76; H, 4.13%.

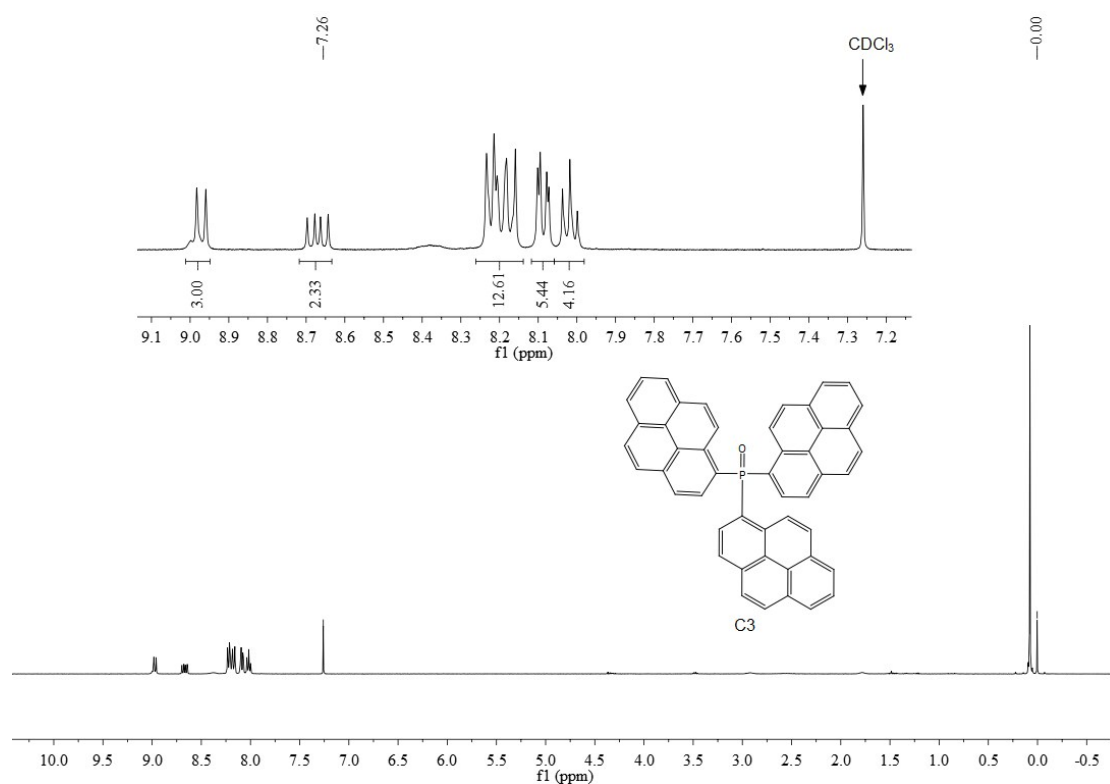

$^1\text{H}$ -NMR spectrum of C3 in  $\text{CDCl}_3$

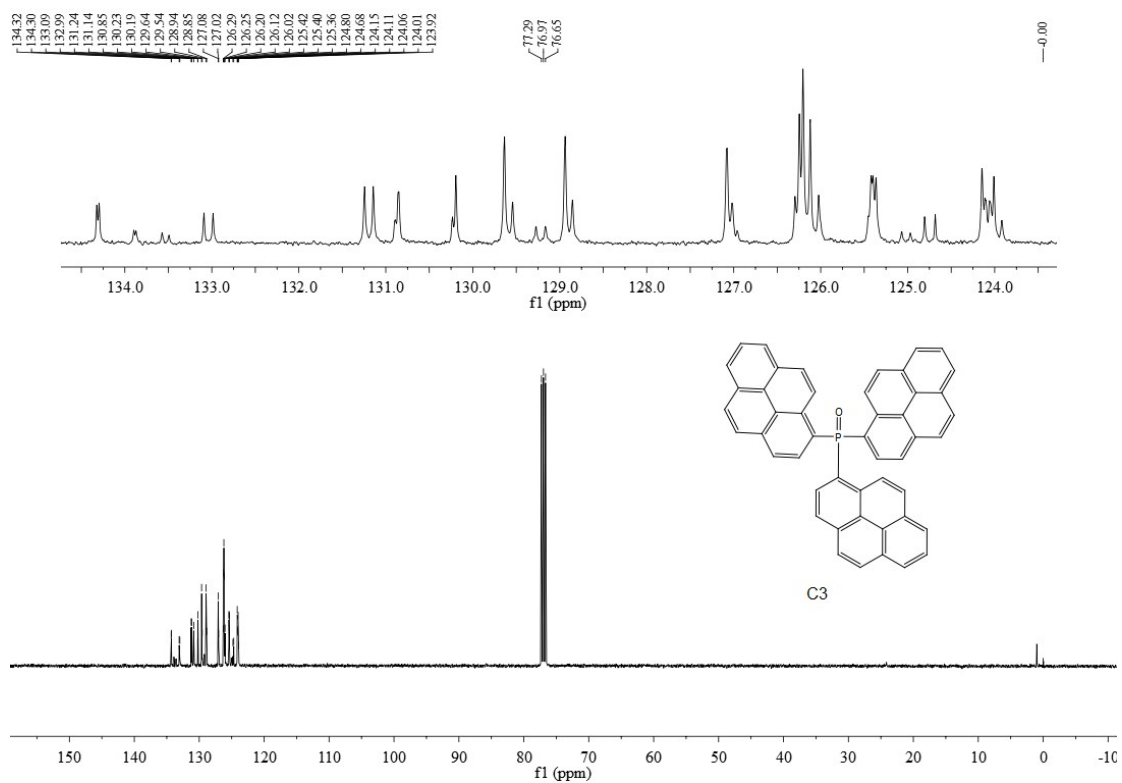

<sup>13</sup>C-NMR spectrum of C3 in CDCl<sub>3</sub>

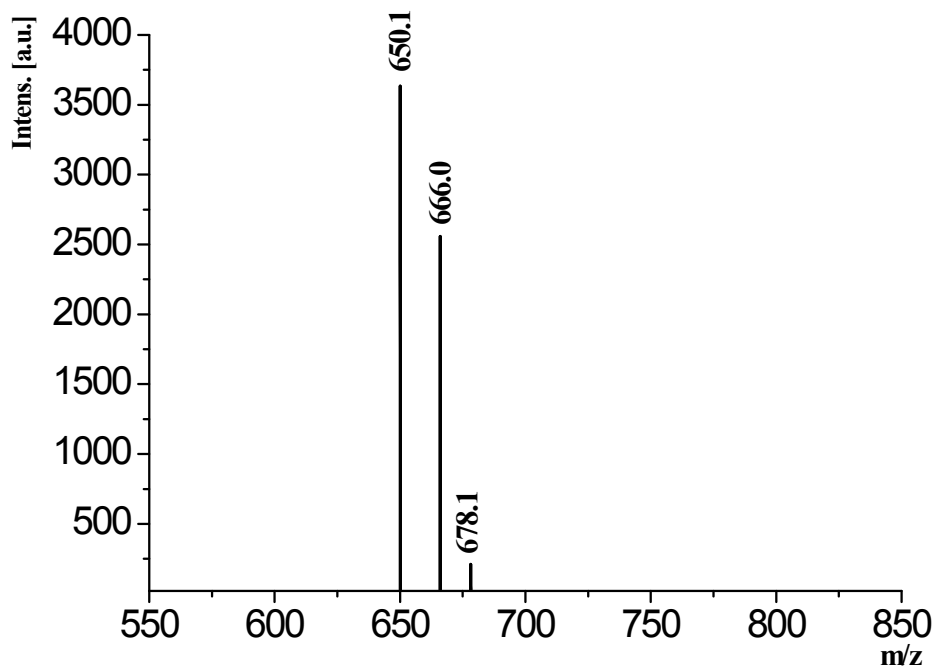

MALDI-TOF spectrum of C3



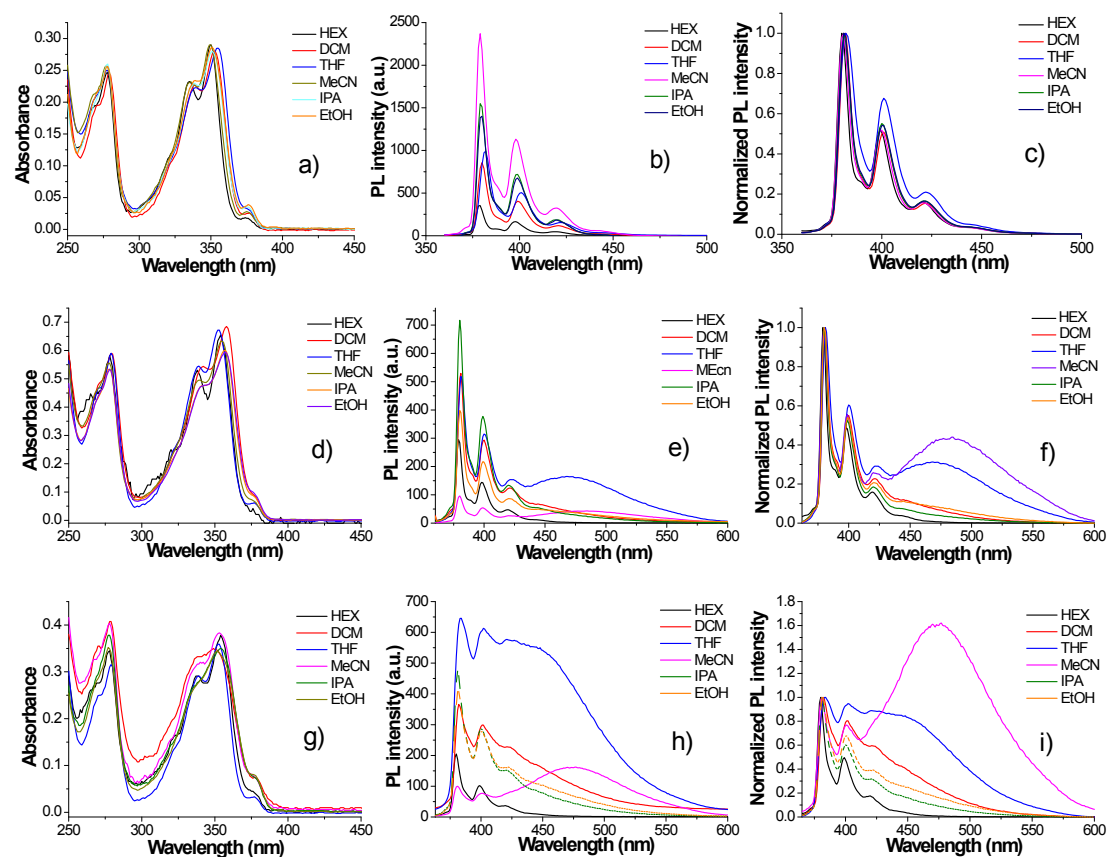

**Figure S1.** The absorption, fluorescence spectra and normalized fluorescence spectra of C1 (a, b and c), C2 (d, e and f), and C3 (g, h and i) in various solvents ( $1.0 \times 10^{-5}$  mol/L) at room temperature.

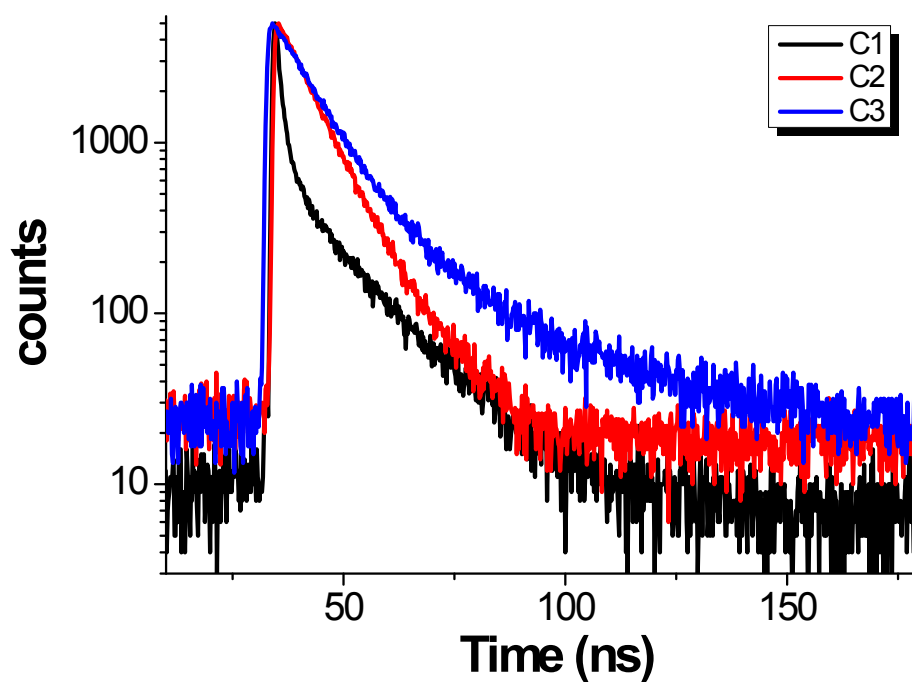

**Figure S2.** PL decay spectrum of C1, C2 and C3 detected at 450 nm in MOE ( $1.0 \times 10^{-5}$  mol/L) at room temperature.

**Table S1.** Fitting data of the fluorescence decay of C1, C2 and C3 in MOE ( $1.0 \times 10^{-5}$  mol/L) at room temperature, detected at 450 nm.

|    | $\tau_1$ /ns | $\tau_2$ /ns  | $\langle\tau\rangle^a$ /ns | $\chi^2$ |
|----|--------------|---------------|----------------------------|----------|
| C1 | 12 (100%)    | -             | 12                         | 1.016    |
| C2 | 7.8 (92.12%) | 17.5 (7.88%)  | 8.56                       | 1.085    |
| C3 | 9.5 (80.56%) | 32.3 (19.44%) | 13.93                      | 1.051    |

<sup>a</sup> the average lifetime

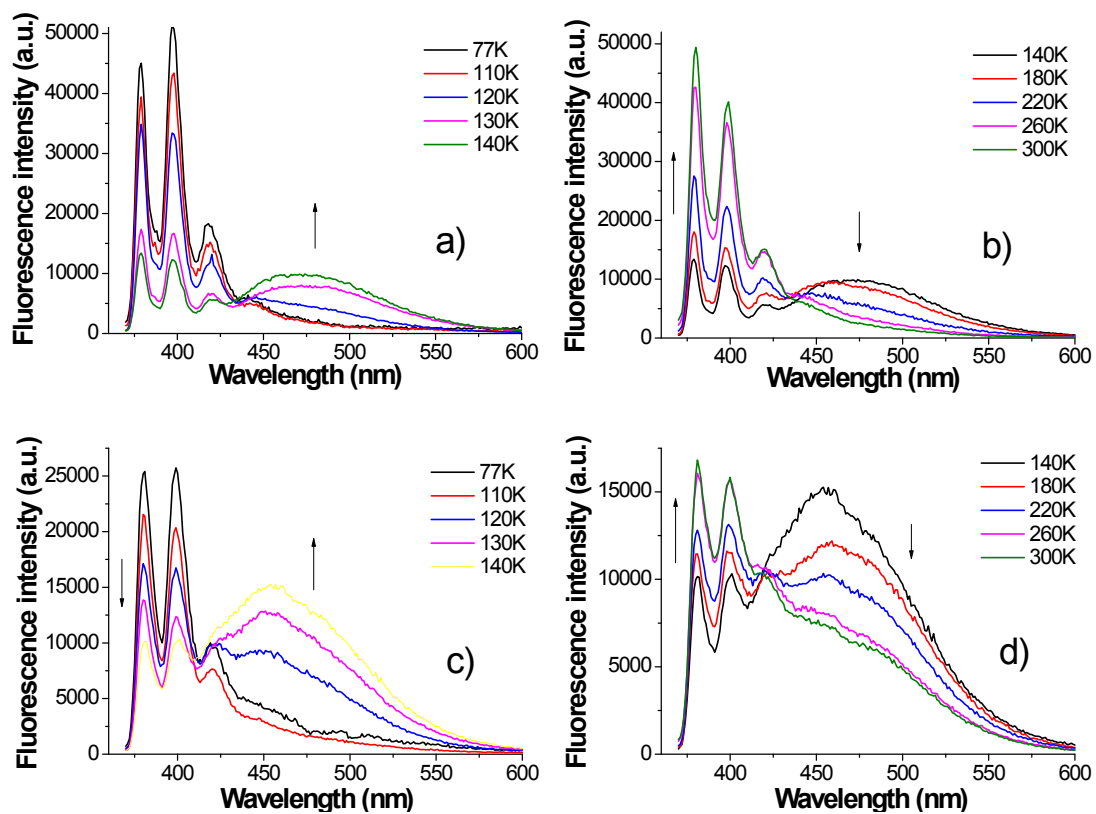

**Figure S3.** Emission spectra of the C2 (a, b) and C3 (c, d) in 2-Methyltetrahydrofuran solvent ( $1.0 \times 10^{-5}$  mol/L) by changing the temperature from 77 to 300K.

**Table S2.** TDDFT calculated results of C1、C2 and C3

|            | LE state                                                                                      | CT state                                                                                      |
|------------|-----------------------------------------------------------------------------------------------|-----------------------------------------------------------------------------------------------|
| Wavelength | 380.05 nm                                                                                     | —                                                                                             |
| $f^a$      | 0.4093                                                                                        | —                                                                                             |
| transition | HOMO→LUMO (95%)                                                                               | —                                                                                             |
| C1         | 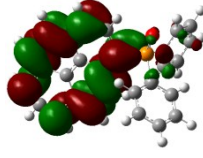<br>LUMO     | —                                                                                             |
|            | <br>HOMO     | —                                                                                             |
| Wavelength | 380.71 nm                                                                                     | 508.94 nm                                                                                     |
| $f^a$      | 0.7233                                                                                        | $f=0.0190$                                                                                    |
| transition | HOMO-1→LUMO (78%)                                                                             | HOMO→LUMO (99%)                                                                               |
| C2         | <br>LUMO    | <br>LUMO   |
|            | <br>HOMO-1 | <br>HOMO  |
| Wavelength | 381.44 nm                                                                                     | 506.71 nm                                                                                     |
| $f^a$      | 0.4674                                                                                        | 0.0006                                                                                        |
| Transition | HOMO-2 → LUMO (78%)                                                                           | HOMO → LUMO (100%)                                                                            |
| C3         | <br>LUMO   | <br>LUMO |
|            | <br>HOMO-2 | <br>HOMO |

a) Oscillator strength

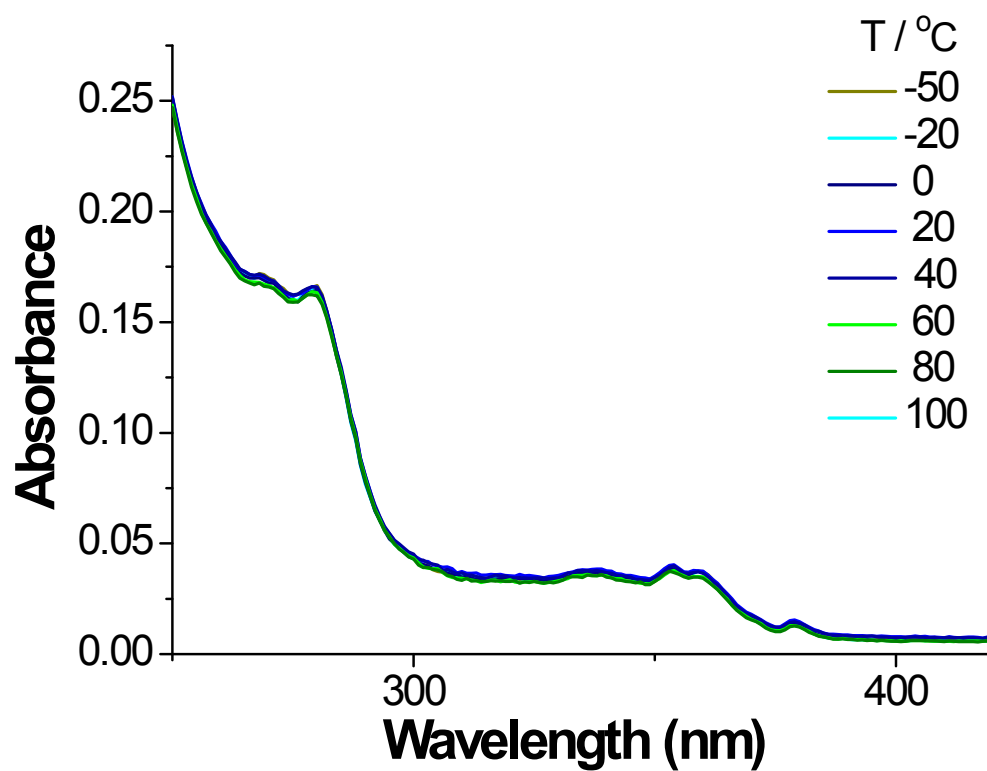

**Figure S4.** Absorption spectra of the C3 in MOE ( $5.0 \times 10^{-6}$  mol/L) at gradually increasing temperatures.

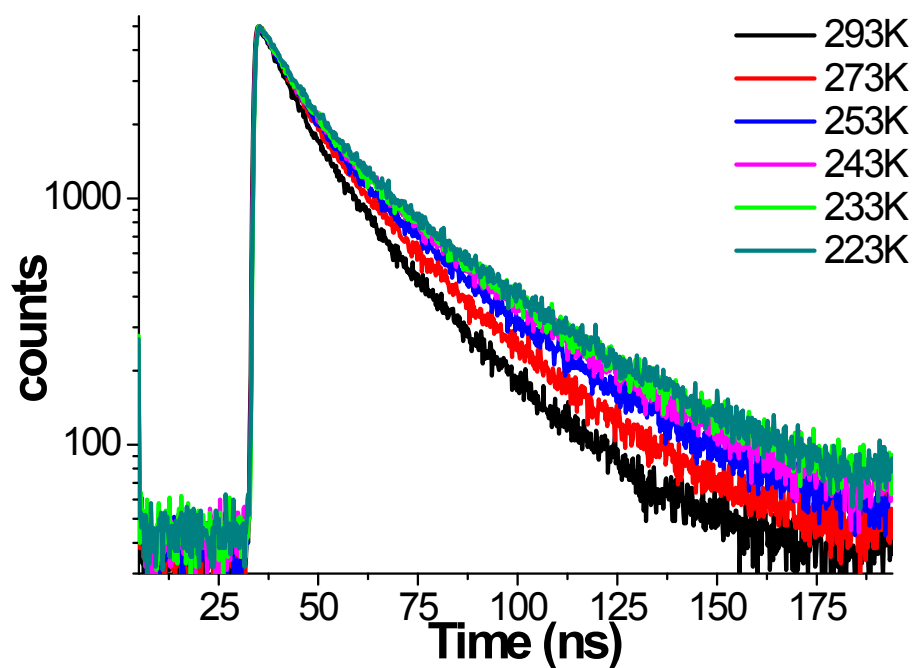

**Figure S5.** PL decay spectrum of C3 detected at 500 nm in MOE ( $1.0 \times 10^{-5}$  mol/L) at gradually reduce temperatures form 223 to 293K.

**Table S3.** Fitting data of the fluorescence decay of C3 in MOE ( $1.0 \times 10^{-5}$  mol/L) at gradually reduce temperatures form 293K to 223K.

| T/K | $\tau^1$ /ns  | $\tau^2$ /ns  | $\langle\tau\rangle^a$ /ns | $\chi^2$ |
|-----|---------------|---------------|----------------------------|----------|
| 293 | 9.34 (58.3%)  | 30.49 (41.7%) | 18.16                      | 1.093    |
| 273 | 9.68 (44.0%)  | 28.63 (56.0%) | 20.29                      | 0.939    |
| 253 | 9.18 (31.5%)  | 32.11 (68.5%) | 24.88                      | 1.014    |
| 243 | 10.00 (28.6%) | 32.54 (71.4%) | 26.09                      | 1.141    |
| 233 | 9.41 (25.8%)  | 34.73 (74.2%) | 28.19                      | 1.111    |
| 223 | 9.34(25.1%)   | 34.73 (74.9%) | 28.35                      | 1.094    |

<sup>a</sup> the average lifetime

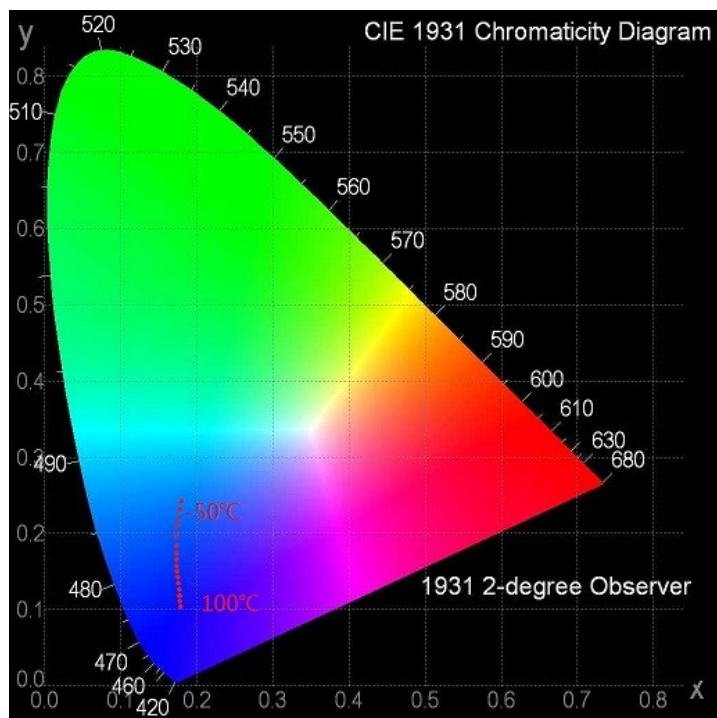

**Figure S6.** CIE chromaticity diagram showing the temperature dependence of the (x, y) color coordinates of C3-MOE system.

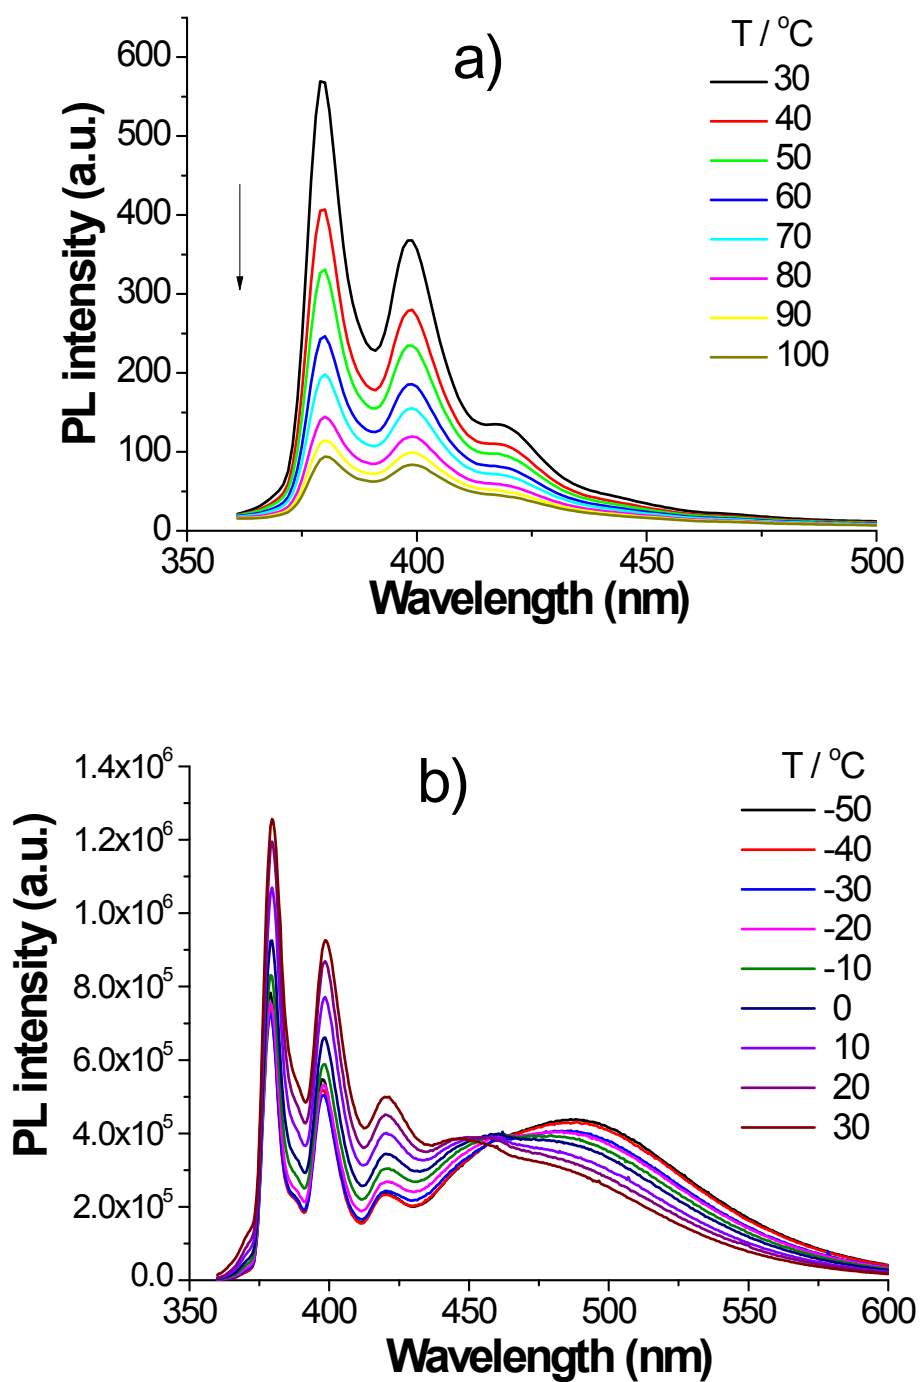

**Figure S7.** Temperature-dependent emission spectra of C1 (a) and C2 (b) in MOE ( $1.0 \times 10^{-5}$  mol/L) with excitation wavelength of 360 nm.
